# Supplementary material for: Plasma Metabolites Associated with Brain MRI Measures in Older Adults in the Atherosclerosis Risk in Communities &ndash; Neurocognitive Study (ARIC-NCS)
Source: Preprints.org preprint supplement (doi:10.20944/preprints201903.0254.v1), 2019-03-28
Supplement: Supplementary file 1 [file supplementary]

## Sheet: Supplementary Table 1
Supplementary Table 1: The list of metabolites with >80% values mssing or below LOD and with 50-80% missing or below LOD values.
A: Those with all measurements below the LOD (100%)
C5:1-DC
C9
C12-DC
C16:1-OH
PC aa C26:0
PEA
B: Those with the majority of measurements below the LOD (80-99%)
C3:1
C3-OH
C5-1
C5-M-DC
C6-1
C7-DC
C10:2
C12:1
C14
C14:1-OH
C14:2-OH
C16:1
C16:2
C16:2-OH
C16-OH
C18:1-OH
DOPA
Dopamine
Histamine
lysoPC a C14:0
PC ae C42:0
C: Model didn't converge
H1
D: Those with with 50-80% missing or below LOD values
PC aa C40:1
Butenyl-L-carnitine (C4:1)
Hydroxyvaleryl-L-carnitine [C5-OH (C3-DC-M)]
Glutaryl-L-carnitine [C5-DC (C6-OH)]
Octanoyl-L-carnitine (C8)
Dodecanoyl-L-carnitine (C12)
Tetradecadienyl-L-carnitine (C14:2)
Carnosine
Nitrotyrosine (Nitro-Tyr)
Spermidine

## Sheet: Supplementary Table 2
Supplementary Table 2. Weighted* logistic regression of individual metabolites (log-transformed per 1-SD difference) with lacunar infarcts, Atherosclerosis Risk in Communities (ARIC) Study, 2011 to 2013
Metabolites	n	Lacunar infarct n	Odds ratio (95% CI)	p-value
Asymmetric dimethylarginine (ADMA)	238	54	1.35 (0.81, 2.25)	0.243864
Alanine	238	54	0.96 (0.62, 1.50)	0.867705
Arginine	238	54	1.46 (0.86, 2.48)	0.162439
Asparagine	238	54	0.92 (0.53, 1.61)	0.781026
DL-carnitine (C0)	238	54	0.77 (0.46, 1.29)	0.321556
Acetyl-L-carnitine (C2)	238	54	1.11 (0.65, 1.90)	0.701995
Propionyl-L-carnitine (C3)	237	54	0.77 (0.43, 1.39)	0.387402
Hydroxybutyryl-L-carnitine [C4-OH (C3-DC)]	237	54	1.89 (1.04, 3.45)	0.0381419
Butyryl-L-carnitine (C4)	237	54	0.73 (0.40, 1.33)	0.303904
Valeryl-L-carnitine (C5)	238	54	0.78 (0.36, 1.68)	0.525164
Glutaryl-L-carnitine [C5-DC (C6:OH)]**	238	54	1.62 (0.89, 2.95)	0.112559
Hexanoyl-L-carnitine [C6 (C4:1-DC)]	238	54	1.38 (0.86, 2.21)	0.177526
Octanoyl-L-carnitine (C8)**	238	54	1.34 (0.81, 2.24)	0.2555
Decanoyl-L-carnitine (C10)	234	53	1.16 (0.73, 1.84)	0.538139
Decenoyl-L-carnitine (C10:1)	234	53	1.46 (0.83, 2.58)	0.189684
Dodecanoyl-L-carnitine (C12)**	234	53	1.50 (0.77, 2.91)	0.230617
Tetradecenoyl-L-carnitine (C14:1)	225	51	0.73 (0.39, 1.36)	0.32102
Tetradecadienyl-L-carnitine (C14:2)**	225	51	1.65 (0.87, 3.12)	0.126213
Hexadecanoyl-L-carnitine (C16)	225	51	2.23 (1.26, 3.93)	0.0058763
Octadecanoyl-L-carnitine (C18)	234	53	1.76 (1.08, 2.89)	0.024586
Octadecenoyl-L-carnitine (C18:1)	234	53	1.50 (0.98, 2.31)	0.0630252
Citrulline	238	54	0.78 (0.50, 1.22)	0.285542
Creatinine	238	54	0.40 (0.19, 0.84)	0.0149791
Glutamine	238	54	1.82 (0.93, 3.54)	0.078377
Glycine	238	54	1.51 (0.98, 2.32)	0.0600104
Hexose (H1)	127	31	-	-
Histidine	238	54	0.65 (0.40, 1.05)	0.0798705
Isoleucine	238	54	1.13 (0.60, 2.12)	0.698661
Kynurenine	238	54	0.66 (0.37, 1.19)	0.167616
Leucine	238	54	0.84 (0.49, 1.42)	0.506237
Lysine	238	54	1.14 (0.72, 1.80)	0.583261
lysoPC a C16:0	238	54	0.84 (0.42, 1.68)	0.62075
lysoPC a C16:1	238	54	0.74 (0.45, 1.22)	0.24018
lysoPC a C17:0	238	54	0.87 (0.48, 1.59)	0.654541
lysoPC a C18:0	238	54	0.90 (0.44, 1.86)	0.778926
lysoPC a C18:1	238	54	0.76 (0.46, 1.28)	0.302289
lysoPC a C18:2	238	54	0.76 (0.42, 1.37)	0.358698
lysoPC a C20:3	238	54	0.70 (0.40, 1.24)	0.218988
lysoPC a C20:4	238	54	0.94 (0.50, 1.79)	0.856914
lysoPC a C28:1	238	54	0.90 (0.51, 1.58)	0.713824
Methionine	238	54	0.92 (0.54, 1.58)	0.773386
Ornithine	238	54	1.09 (0.71, 1.66)	0.697478
PC aa C24:0	238	54	1.65 (1.02, 2.69)	0.0422201
PC aa C28:1	238	54	1.38 (0.74, 2.57)	0.307755
PC aa C30:0	238	54	0.97 (0.54, 1.74)	0.908199
PC aa C32:0	238	54	1.54 (0.90, 2.64)	0.116429
PC aa C32:1	238	54	1.01 (0.57, 1.80)	0.960567
PC aa C32:2	238	54	0.62 (0.29, 1.33)	0.218091
PC aa C32:3	238	54	0.82 (0.49, 1.35)	0.431218
PC aa C34:1	238	54	1.27 (0.67, 2.40)	0.461952
PC aa C34:2	238	54	1.22 (0.63, 2.36)	0.564653
PC aa C34:3	238	54	0.68 (0.31, 1.50)	0.340728
PC aa C34:4	238	54	0.65 (0.34, 1.25)	0.194195
PC aa C36:0	238	54	1.32 (0.72, 2.42)	0.366069
PC aa C36:1	238	54	0.97 (0.52, 1.82)	0.934213
PC aa C36:2	238	54	1.03 (0.53, 2.01)	0.921555
PC aa C36:3	238	54	0.68 (0.33, 1.41)	0.302499
PC aa C36:4	238	54	1.24 (0.60, 2.55)	0.563441
PC aa C38:0	238	54	1.62 (0.89, 2.95)	0.11614
PC aa C38:1	238	54	0.82 (0.52, 1.28)	0.376234
PC aa C38:3	238	54	0.95 (0.52, 1.74)	0.866884
PC aa C38:4	238	54	1.18 (0.61, 2.26)	0.628092
PC aa C38:5	238	54	1.27 (0.76, 2.12)	0.36647
PC aa C38:6	238	54	2.98 (1.68, 5.32)	0.000206079
PC aa C40:1**	238	54	1.40 (0.73, 2.67)	0.310148
PC aa C40:2	238	54	1.06 (0.64, 1.74)	0.832431
PC aa C40:3	238	54	0.96 (0.55, 1.68)	0.892492
PC aa C40:4	238	54	0.72 (0.38, 1.36)	0.312421
PC aa C40:5	238	54	1.38 (0.76, 2.49)	0.28812
PC aa C40:6	238	54	2.75 (1.65, 4.58)	9.90343e-05
PC aa C42:0	238	54	1.38 (0.83, 2.29)	0.220405
PC aa C42:1	238	54	1.20 (0.77, 1.87)	0.415808
PC aa C42:2	238	54	1.16 (0.68, 1.97)	0.577535
PC aa C42:4	238	54	0.81 (0.47, 1.40)	0.454925
PC aa C42:5	238	54	1.13 (0.68, 1.89)	0.641541
PC aa C42:6	238	54	1.58 (1.03, 2.40)	0.034811
PC ae C30:0	238	54	1.06 (0.57, 1.96)	0.859379
PC ae C30:2	238	54	1.03 (0.58, 1.81)	0.922966
PC ae C32:1	238	54	1.15 (0.63, 2.09)	0.657665
PC ae C32:2	238	54	0.82 (0.42, 1.59)	0.557855
PC ae C34:0	238	54	1.11 (0.66, 1.87)	0.689283
PC ae C34:1	238	54	0.96 (0.53, 1.72)	0.880595
PC ae C34:2	238	54	1.03 (0.53, 1.99)	0.933392
PC ae C34:3	238	54	0.48 (0.24, 0.96)	0.0389137
PC ae C36:0	238	54	1.76 (1.02, 3.02)	0.0410745
PC ae C36:1	238	54	0.96 (0.52, 1.77)	0.898658
PC ae C36:2	238	54	0.93 (0.50, 1.72)	0.806731
PC ae C36:3	238	54	0.94 (0.53, 1.68)	0.837124
PC ae C36:4	238	54	1.04 (0.60, 1.80)	0.897043
PC ae C36:5	238	54	0.96 (0.52, 1.77)	0.900477
PC ae C38:0	238	54	1.66 (0.87, 3.17)	0.122425
PC ae C38:2	238	54	1.14 (0.60, 2.16)	0.685926
PC ae C38:3	238	54	0.90 (0.50, 1.62)	0.725312
PC ae C38:4	238	54	1.05 (0.62, 1.76)	0.856056
PC ae C38:5	238	54	1.16 (0.68, 1.98)	0.593921
PC ae C38:6	238	54	1.51 (0.78, 2.94)	0.222105
PC ae C40:1	238	54	1.47 (0.64, 3.39)	0.36173
PC ae C40:2	238	54	1.82 (0.89, 3.71)	0.101093
PC ae C40:3	238	54	0.91 (0.48, 1.73)	0.774036
PC ae C40:4	238	54	0.93 (0.58, 1.49)	0.751469
PC ae C40:5	238	54	1.50 (0.84, 2.65)	0.169073
PC ae C40:6	238	54	2.18 (1.14, 4.17)	0.0180528
PC ae C42:1	238	54	1.33 (0.74, 2.40)	0.340337
PC ae C42:2	238	54	0.96 (0.56, 1.63)	0.875786
PC ae C42:3	238	54	1.47 (0.73, 2.98)	0.280291
PC ae C42:4	238	54	0.90 (0.55, 1.49)	0.683952
PC ae C42:5	238	54	1.03 (0.64, 1.68)	0.897673
PC ae C44:3	238	54	1.21 (0.74, 1.98)	0.454464
PC ae C44:4	238	54	1.22 (0.71, 2.10)	0.469774
PC ae C44:5	238	54	1.05 (0.65, 1.71)	0.836258
PC ae C44:6	238	54	1.21 (0.74, 1.98)	0.447543
Phenylalanine	238	54	0.83 (0.48, 1.42)	0.496331
Proline	238	54	1.11 (0.68, 1.81)	0.679813
Serine	238	54	1.66 (1.01, 2.75)	0.0475585
SM C16:0	238	54	1.67 (0.81, 3.43)	0.166999
SM C16:1	238	54	1.21 (0.65, 2.26)	0.547244
SM C18:0	238	54	2.10 (1.07, 4.10)	0.030517
SM C18:1	238	54	1.43 (0.73, 2.79)	0.294385
SM C20:2	238	54	1.23 (0.70, 2.16)	0.466567
SM C24:0	238	54	0.90 (0.50, 1.61)	0.711433
SM C24:1	238	54	2.04 (0.97, 4.29)	0.06059
SM C26:1	238	54	1.08 (0.57, 2.04)	0.811568
SM (OH) C14:1	238	54	1.22 (0.62, 2.41)	0.568461
SM (OH) C16:1	238	54	1.32 (0.63, 2.74)	0.463482
Spermine	232	54	-	-
t4-Hydroxyproline (t4-OH-Pro)	238	54	1.02 (0.61, 1.69)	0.945632
Taurine	238	54	1.30 (0.80, 2.11)	0.292866
Threonine	238	54	1.27 (0.77, 2.11)	0.352603
Tryptophan	238	54	0.69 (0.38, 1.27)	0.233782
Tyrosine	238	54	0.66 (0.39, 1.10)	0.10663
Valine	238	54	1.02 (0.58, 1.81)	0.937606
Model: Logistic regression adjusted for age, race/center, sex, APOE, education level, body mass index, diabetes mellitus, drinking status, HDL cholesterol, smoking status, sports index, systolic blood pressure, total cholesterol, triglycerides, use of antihypertensive medications, use of statins, depression, and prevalent coronary heart disease, heart failure, and stroke at the ARIC visit 5.
*All analyses incorporated a weight accounting for selection into the phospholipid study group from the ARIC visit 5 sample.
**Phospholipid modeled as a 3 group ordinal variable (below LOD, >LOD-<Median, >Median).
Boldness indicates p value less than 0.00038

## Sheet: Supplementary Table 3
Supplementary Table 3. Weighted* linear regression of individual metabolites (log-transformed per 1-SD difference) with white matter hyperintensity (log-transformed), Atherosclerosis Risk in Communities (ARIC) Study, 2011 to 2013
Metabolites	n	β (95% CI)	p-value
Asymmetric dimethylarginine (ADMA)	237	0.12 (-0.02, 0.26)	0.0911052
Alanine	237	-0.06 (-0.23, 0.10)	0.4532
Arginine	237	-0.20 (-0.30, -0.11)	<0.0001
Asparagine	237	0.05 (-0.11, 0.20)	0.558402
DL-carnitine (C0)	237	-0.02 (-0.14, 0.09)	0.669934
Acetyl-L-carnitine (C2)	237	-0.14 (-0.26, -0.02)	0.0261332
Propionyl-L-carnitine (C3)	236	0.10 (-0.05, 0.26)	0.193129
Hydroxybutyryl-L-carnitine [C4-OH (C3-DC)]	236	-0.03 (-0.15, 0.10)	0.682014
Butyryl-L-carnitine (C4)	236	0.06 (-0.06, 0.19)	0.317746
Valeryl-L-carnitine (C5)	237	0.05 (-0.07, 0.18)	0.427035
Glutaryl-L-carnitine [C5-DC (C6:OH)]**	237	-0.03 (-0.20, 0.14)	0.760036
Hexanoyl-L-carnitine [C6 (C4:1-DC)]	237	0.0003 (-0.14, 0.14)	0.99
Octanoyl-L-carnitine (C8)**	237	-0.05 (-0.22, 0.13)	0.600891
Decanoyl-L-carnitine (C10)	233	0.02 (-0.14, 0.18)	0.783517
Decenoyl-L-carnitine (C10:1)	233	-0.05 (-0.20, 0.10)	0.49695
Dodecanoyl-L-carnitine (C12)**	233	0.07 (-0.12, 0.26)	0.44908
Tetradecenoyl-L-carnitine (C14:1)	224	-0.05 (-0.20, 0.10)	0.48546
Tetradecadienyl-L-carnitine (C14:2)**	224	-0.14 (-0.34, 0.06)	0.162129
Hexadecanoyl-L-carnitine (C16)	224	-0.04 (-0.17, 0.08)	0.472646
Octadecanoyl-L-carnitine (C18)	233	-0.04 (-0.16, 0.07)	0.460573
Octadecenoyl-L-carnitine (C18:1)	233	-0.01 (-0.12, 0.10)	0.810201
Citrulline	237	0.07 (-0.06, 0.19)	0.287841
Creatinine	237	0.05 (-0.08, 0.17)	0.484118
Glutamine	237	-0.22 (-0.32, -0.11)	<0.0001
Glycine	237	0.02 (-0.10, 0.14)	0.732796
Hexose (H1)	127	-0.07 (-0.26, 0.11)	0.428414
Histidine	237	0.07 (-0.06, 0.20)	0.300849
Isoleucine	237	0.04 (-0.09, 0.18)	0.5108
Kynurenine	237	-0.08 (-0.24, 0.09)	0.363342
Leucine	237	0.14 (0.02, 0.27)	0.0276965
Lysine	237	0.004 (-0.13, 0.14)	0.952026
lysoPC a C16:0	237	0.01 (-0.16, 0.17)	0.953581
lysoPC a C16:1	237	0.10 (-0.06, 0.25)	0.213011
lysoPC a C17:0	237	-0.11 (-0.24, 0.02)	0.104468
lysoPC a C18:0	237	-0.06 (-0.21, 0.09)	0.455355
lysoPC a C18:1	237	-0.005 (-0.14, 0.13)	0.947994
lysoPC a C18:2	237	-0.01 (-0.16, 0.13)	0.868007
lysoPC a C20:3	237	0.03 (-0.11, 0.17)	0.673336
lysoPC a C20:4	237	0.01 (-0.14, 0.16)	0.866573
lysoPC a C28:1	237	-0.01 (-0.15, 0.13)	0.891318
Methionine	237	0.12 (-0.02, 0.27)	0.0938159
Ornithine	237	0.07 (-0.06, 0.20)	0.31081
PC aa C24:0	237	0.05 (-0.09, 0.18)	0.504227
PC aa C28:1	237	0.08 (-0.08, 0.24)	0.313707
PC aa C30:0	237	0.13 (-0.06, 0.31)	0.175798
PC aa C32:0	237	0.13 (-0.06, 0.31)	0.186509
PC aa C32:1	237	0.14 (-0.01, 0.30)	0.0748152
PC aa C32:2	237	0.09 (-0.10, 0.29)	0.350249
PC aa C32:3	237	0.01 (-0.15, 0.17)	0.916471
PC aa C34:1	237	0.09 (-0.08, 0.25)	0.308106
PC aa C34:2	237	-0.05 (-0.26, 0.15)	0.607891
PC aa C34:3	237	0.01 (-0.21, 0.23)	0.934851
PC aa C34:4	237	0.02 (-0.15, 0.18)	0.82406
PC aa C36:0	237	-0.02 (-0.16, 0.13)	0.804756
PC aa C36:1	237	0.07 (-0.10, 0.23)	0.432018
PC aa C36:2	237	-0.11 (-0.31, 0.10)	0.312022
PC aa C36:3	237	-0.08 (-0.27, 0.12)	0.446837
PC aa C36:4	237	-0.05 (-0.22, 0.13)	0.594634
PC aa C38:0	237	-0.02 (-0.17, 0.13)	0.758959
PC aa C38:1	237	-0.10 (-0.22, 0.02)	0.0937489
PC aa C38:3	237	0.02 (-0.17, 0.20)	0.865985
PC aa C38:4	237	-0.05 (-0.22, 0.11)	0.535677
PC aa C38:5	237	0.12 (-0.05, 0.28)	0.159168
PC aa C38:6	237	0.02 (-0.13, 0.16)	0.798677
PC aa C40:1**	237	-0.15 (-0.34, 0.05)	0.15399
PC aa C40:2	237	-0.10 (-0.24, 0.04)	0.144808
PC aa C40:3	237	-0.03 (-0.20, 0.14)	0.746862
PC aa C40:4	237	-0.04 (-0.19, 0.11)	0.583259
PC aa C40:5	237	0.14 (-0.03, 0.30)	0.10244
PC aa C40:6	237	0.04 (-0.12, 0.19)	0.63053
PC aa C42:0	237	-0.09 (-0.23, 0.05)	0.210438
PC aa C42:1	237	-0.14 (-0.28, 0.01)	0.0651883
PC aa C42:2	237	-0.13 (-0.27, 0.02)	0.0855699
PC aa C42:4	237	-0.16 (-0.30, -0.01)	0.0320147
PC aa C42:5	237	0.10 (-0.05, 0.26)	0.18191
PC aa C42:6	237	0.07 (-0.05, 0.18)	0.261882
PC ae C30:0	237	-0.02 (-0.18, 0.15)	0.824348
PC ae C30:2	237	-0.03 (-0.18, 0.12)	0.713531
PC ae C32:1	237	0.02 (-0.14, 0.18)	0.821066
PC ae C32:2	237	-0.01 (-0.17, 0.15)	0.923795
PC ae C34:0	237	-0.04 (-0.20, 0.11)	0.59313
PC ae C34:1	237	-0.06 (-0.22, 0.11)	0.50815
PC ae C34:2	237	-0.13 (-0.30, 0.05)	0.158265
PC ae C34:3	237	-0.13 (-0.29, 0.03)	0.123163
PC ae C36:0	237	-0.09 (-0.24, 0.07)	0.278804
PC ae C36:1	237	-0.12 (-0.28, 0.04)	0.13369
PC ae C36:2	237	-0.17 (-0.32, -0.02)	0.0258387
PC ae C36:3	237	-0.16 (-0.32, 0.002)	0.0536158
PC ae C36:4	237	-0.11 (-0.26, 0.03)	0.131585
PC ae C36:5	237	-0.05 (-0.22, 0.12)	0.564888
PC ae C38:0	237	0.06 (-0.09, 0.21)	0.443537
PC ae C38:2	237	-0.16 (-0.31, -0.01)	0.0341732
PC ae C38:3	237	-0.13 (-0.28, 0.03)	0.104441
PC ae C38:4	237	-0.18 (-0.32, -0.04)	0.0108792
PC ae C38:5	237	-0.12 (-0.27, 0.03)	0.121486
PC ae C38:6	237	-0.02 (-0.19, 0.15)	0.814612
PC ae C40:1	237	-0.003 (-0.18, 0.18)	0.974783
PC ae C40:2	237	-0.10 (-0.24, 0.04)	0.158568
PC ae C40:3	237	-0.24 (-0.37, -0.10)	0.000603115
PC ae C40:4	237	-0.25 (-0.38, -0.12)	0.000154418
PC ae C40:5	237	-0.19 (-0.32, -0.06)	0.00471122
PC ae C40:6	237	-0.10 (-0.25, 0.04)	0.170202
PC ae C42:1	237	-0.07 (-0.20, 0.06)	0.294161
PC ae C42:2	237	-0.10 (-0.23, 0.03)	0.121623
PC ae C42:3	237	-0.25 (-0.40, -0.09)	0.00145659
PC ae C42:4	237	-0.29 (-0.42, -0.16)	<0.0001
PC ae C42:5	237	-0.25 (-0.39, -0.12)	0.000252053
PC ae C44:3	237	-0.06 (-0.18, 0.06)	0.3216
PC ae C44:4	237	-0.25 (-0.40, -0.09)	0.00194471
PC ae C44:5	237	-0.24 (-0.38, -0.10)	0.00101886
PC ae C44:6	237	-0.18 (-0.31, -0.05)	0.00806883
Phenylalanine	237	0.07 (-0.08, 0.22)	0.384168
Proline	237	0.03 (-0.13, 0.19)	0.734931
Serine	237	-0.003 (-0.13, 0.12)	0.962754
SM C16:0	237	0.06 (-0.17, 0.29)	0.619873
SM C16:1	237	0.01 (-0.17, 0.19)	0.893375
SM C18:0	237	0.04 (-0.15, 0.22)	0.686201
SM C18:1	237	0.02 (-0.15, 0.19)	0.81073
SM C20:2	237	0.02 (-0.13, 0.17)	0.777459
SM C24:0	237	-0.17 (-0.35, 0.01)	0.0645932
SM C24:1	237	0.05 (-0.16, 0.25)	0.646456
SM C26:1	237	-0.01 (-0.16, 0.14)	0.891324
SM (OH) C14:1	237	0.01 (-0.16, 0.18)	0.925443
SM (OH) C16:1	237	-0.07 (-0.22, 0.07)	0.322027
Spermine	231	0.08 (-0.05, 0.20)	0.219921
t4-Hydroxyproline (t4-OH-Pro)	237	-0.12 (-0.26, 0.03)	0.119727
Taurine	237	-0.11 (-0.24, 0.02)	0.0952432
Threonine	237	-0.05 (-0.20, 0.10)	0.539312
Tryptophan	237	-0.02 (-0.16, 0.13)	0.836218
Tyrosine	237	-0.01 (-0.16, 0.14)	0.904101
Valine	237	0.02 (-0.12, 0.16)	0.79188
Model: Linear regression adjusted for age, race/center, sex, APOE, education level, estimated total intracranial volume, body mass index, diabetes mellitus, drinking status, HDL cholesterol, smoking status, sports index, systolic blood pressure, total cholesterol, triglycerides, use of antihypertensive medications, use of statins, depression, and prevalent coronary heart disease, heart failure, a…
*All analyses incorporated a weight accounting for selection into the phospholipid study group from the ARIC visit 5 sample.
**Phospholipid modeled as a 3 group ordinal variable (below LOD, >LOD-<Median, >Median).
Boldness indicates p value less than 0.00038.

## Sheet: Supplementary Table 4
Supplementary Table 4. Weighted* linear regression of individual metabolites (log-transformed per 1-SD difference) with total brain volume, Atherosclerosis Risk in Communities (ARIC) Study, 2011 to 2013
Metabolites	n	β (95% CI)	p-value
Asymmetric dimethylarginine (ADMA)	237	-2.11 (-8.31, 4.08)	0.503544
Alanine	237	0.43 (-6.52, 7.38)	0.902901
Arginine	237	4.64 (-1.75, 11.03)	0.154479
Asparagine	237	1.73 (-4.03, 7.49)	0.555859
DL-carnitine (C0)	237	-1.89 (-7.89, 4.11)	0.536126
Acetyl-L-carnitine (C2)	237	-4.84 (-11.05, 1.37)	0.126901
Propionyl-L-carnitine (C3)	236	-5.08 (-11.60, 1.45)	0.127278
Hydroxybutyryl-L-carnitine [C4-OH (C3-DC)]	236	-2.73 (-8.89, 3.43)	0.385451
Butyryl-L-carnitine (C4)	236	-9.84 (-16.13, -3.56)	0.0021509
Valeryl-L-carnitine (C5)	237	-6.03 (-13.19, 1.12)	0.0985137
Glutaryl-L-carnitine [C5-DC (C6:OH)]**	237	2.10 (-6.49, 10.70)	0.631255
Hexanoyl-L-carnitine [C6 (C4:1-DC)]	237	-2.09 (-8.22, 4.05)	0.504668
Octanoyl-L-carnitine (C8)**	237	-2.89 (-11.51, 5.74)	0.511714
Decanoyl-L-carnitine (C10)	233	-5.57 (-12.68, 1.55)	0.125023
Decenoyl-L-carnitine (C10:1)	233	-3.62 (-10.10, 2.87)	0.274545
Dodecanoyl-L-carnitine (C12)**	233	-7.09 (-17.33, 3.15)	0.174589
Tetradecenoyl-L-carnitine (C14:1)	224	-1.77 (-9.62, 6.08)	0.658525
Tetradecadienyl-L-carnitine (C14:2)**	224	-6.28 (-15.25, 2.70)	0.170315
Hexadecanoyl-L-carnitine (C16)	224	-1.49 (-8.39, 5.40)	0.671218
Octadecanoyl-L-carnitine (C18)	233	-2.99 (-9.55, 3.56)	0.370375
Octadecenoyl-L-carnitine (C18:1)	233	1.45 (-5.42, 8.32)	0.679108
Citrulline	237	7.78 (1.47, 14.08)	0.015635
Creatinine	237	1.77 (-4.88, 8.43)	0.601668
Glutamine	237	2.31 (-4.29, 8.91)	0.492375
Glycine	237	4.30 (-1.23, 9.83)	0.127259
Hexose (H1)	127	0.30 (-10.96, 11.56)	0.958022
Histidine	237	-2.48 (-8.30, 3.34)	0.403459
Isoleucine	237	-0.84 (-7.68, 6.00)	0.810081
Kynurenine	237	6.34 (-0.33, 13.02)	0.0623847
Leucine	237	0.42 (-6.03, 6.86)	0.899509
Lysine	237	3.10 (-3.32, 9.52)	0.34398
lysoPC a C16:0	237	7.80 (-0.64, 16.24)	0.0701088
lysoPC a C16:1	237	8.71 (0.76, 16.67)	0.0317312
lysoPC a C17:0	237	7.82 (1.77, 13.86)	0.0112704
lysoPC a C18:0	237	8.45 (1.55, 15.36)	0.0164197
lysoPC a C18:1	237	4.83 (-2.58, 12.23)	0.201262
lysoPC a C18:2	237	3.66 (-3.90, 11.21)	0.343186
lysoPC a C20:3	237	3.00 (-4.26, 10.26)	0.4182
lysoPC a C20:4	237	5.57 (-1.24, 12.38)	0.108683
lysoPC a C28:1	237	4.75 (-1.63, 11.12)	0.144441
Methionine	237	-0.19 (-6.47, 6.09)	0.95252
Ornithine	237	0.48 (-5.61, 6.57)	0.877342
PC aa C24:0	237	-3.38 (-9.32, 2.56)	0.265321
PC aa C28:1	237	2.63 (-5.78, 11.03)	0.540605
PC aa C30:0	237	0.76 (-7.09, 8.61)	0.849667
PC aa C32:0	237	-2.57 (-10.89, 5.74)	0.544006
PC aa C32:1	237	0.53 (-7.23, 8.29)	0.893055
PC aa C32:2	237	1.90 (-6.45, 10.26)	0.655078
PC aa C32:3	237	12.68 (4.58, 20.78)	0.00214969
PC aa C34:1	237	-3.21 (-11.04, 4.62)	0.42108
PC aa C34:2	237	-2.91 (-12.38, 6.56)	0.547281
PC aa C34:3	237	6.50 (-3.51, 16.51)	0.203087
PC aa C34:4	237	6.36 (-1.36, 14.08)	0.106515
PC aa C36:0	237	-8.23 (-14.78, -1.67)	0.0138576
PC aa C36:1	237	-0.44 (-8.10, 7.22)	0.910221
PC aa C36:2	237	-0.88 (-10.42, 8.66)	0.856425
PC aa C36:3	237	3.48 (-7.73, 14.69)	0.542952
PC aa C36:4	237	3.59 (-4.86, 12.04)	0.404959
PC aa C38:0	237	-7.77 (-14.41, -1.12)	0.0219352
PC aa C38:1	237	-7.01 (-13.88, -0.15)	0.0453549
PC aa C38:3	237	3.43 (-4.73, 11.59)	0.409571
PC aa C38:4	237	5.23 (-3.67, 14.13)	0.249583
PC aa C38:5	237	3.37 (-6.47, 13.21)	0.502131
PC aa C38:6	237	-9.43 (-16.66, -2.20)	0.0105418
PC aa C40:1**	237	-6.40 (-14.75, 1.95)	0.132859
PC aa C40:2	237	-8.66 (-15.92, -1.40)	0.0194299
PC aa C40:3	237	0.83 (-7.45, 9.10)	0.844484
PC aa C40:4	237	1.92 (-5.19, 9.03)	0.596353
PC aa C40:5	237	-0.43 (-9.81, 8.95)	0.928443
PC aa C40:6	237	-9.18 (-16.16, -2.21)	0.00984138
PC aa C42:0	237	-5.55 (-13.03, 1.92)	0.145564
PC aa C42:1	237	-9.16 (-16.41, -1.91)	0.0132234
PC aa C42:2	237	-10.25 (-17.89, -2.60)	0.00860717
PC aa C42:4	237	-0.43 (-7.22, 6.36)	0.901173
PC aa C42:5	237	-6.50 (-13.41, 0.41)	0.0650497
PC aa C42:6	237	-5.22 (-10.91, 0.46)	0.0714935
PC ae C30:0	237	-3.09 (-10.46, 4.28)	0.411195
PC ae C30:2	237	-0.26 (-8.68, 8.17)	0.952665
PC ae C32:1	237	-5.21 (-12.41, 1.99)	0.155898
PC ae C32:2	237	2.73 (-5.82, 11.27)	0.531485
PC ae C34:0	237	-0.19 (-8.08, 7.69)	0.961494
PC ae C34:1	237	2.00 (-6.72, 10.72)	0.65321
PC ae C34:2	237	6.18 (-3.50, 15.86)	0.210956
PC ae C34:3	237	4.35 (-4.06, 12.76)	0.311123
PC ae C36:0	237	-11.10 (-18.34, -3.86)	0.00266216
PC ae C36:1	237	3.97 (-4.64, 12.58)	0.366459
PC ae C36:2	237	3.78 (-5.12, 12.67)	0.405303
PC ae C36:3	237	9.12 (-0.44, 18.68)	0.0616061
PC ae C36:4	237	3.63 (-3.44, 10.70)	0.314635
PC ae C36:5	237	-1.07 (-7.91, 5.76)	0.758216
PC ae C38:0	237	-2.97 (-10.93, 4.98)	0.464117
PC ae C38:2	237	-1.87 (-10.41, 6.67)	0.667939
PC ae C38:3	237	6.60 (-1.48, 14.67)	0.109204
PC ae C38:4	237	1.98 (-5.49, 9.44)	0.603795
PC ae C38:5	237	1.42 (-5.88, 8.72)	0.703159
PC ae C38:6	237	-3.71 (-11.20, 3.77)	0.330973
PC ae C40:1	237	-6.54 (-15.56, 2.49)	0.155879
PC ae C40:2	237	-2.68 (-9.99, 4.62)	0.472001
PC ae C40:3	237	3.40 (-5.16, 11.96)	0.436424
PC ae C40:4	237	-0.79 (-8.15, 6.58)	0.834094
PC ae C40:5	237	0.23 (-8.17, 8.62)	0.95736
PC ae C40:6	237	-8.04 (-15.53, -0.55)	0.0353086
PC ae C42:1	237	0.25 (-5.91, 6.40)	0.937399
PC ae C42:2	237	-10.48 (-17.52, -3.44)	0.00354564
PC ae C42:3	237	-8.17 (-17.65, 1.30)	0.0909824
PC ae C42:4	237	-5.81 (-13.25, 1.62)	0.125524
PC ae C42:5	237	-4.65 (-12.38, 3.09)	0.239252
PC ae C44:3	237	-10.55 (-17.45, -3.64)	0.002755
PC ae C44:4	237	-1.38 (-8.84, 6.09)	0.717187
PC ae C44:5	237	-7.65 (-14.88, -0.43)	0.0379585
PC ae C44:6	237	-5.51 (-13.33, 2.30)	0.166509
Phenylalanine	237	-1.66 (-8.19, 4.88)	0.618877
Proline	237	-2.93 (-9.47, 3.61)	0.380137
Serine	237	1.99 (-5.36, 9.35)	0.59529
SM C16:0	237	5.34 (-2.86, 13.54)	0.201561
SM C16:1	237	7.03 (-0.88, 14.95)	0.0814795
SM C18:0	237	7.58 (-0.52, 15.69)	0.0667314
SM C18:1	237	10.75 (2.60, 18.91)	0.00977047
SM C20:2	237	11.39 (4.48, 18.30)	0.00123654
SM C24:0	237	6.72 (-1.91, 15.35)	0.127066
SM C24:1	237	6.34 (-2.86, 15.54)	0.176967
SM C26:1	237	1.97 (-6.65, 10.58)	0.65479
SM (OH) C14:1	237	3.92 (-4.16, 12.00)	0.341704
SM (OH) C16:1	237	6.18 (-0.80, 13.17)	0.0826423
Spermine	231	-6.14 (-13.12, 0.85)	0.0852277
t4-Hydroxyproline (t4-OH-Pro)	237	-1.18 (-7.50, 5.15)	0.715325
Taurine	237	-0.65 (-8.20, 6.90)	0.865893
Threonine	237	4.82 (-2.46, 12.10)	0.19454
Tryptophan	237	4.30 (-2.32, 10.92)	0.202605
Tyrosine	237	-0.07 (-5.88, 5.75)	0.981962
Valine	237	-0.10 (-6.33, 6.12)	0.974003
Model: Linear regression adjusted for age, race/center, sex, APOE, education level, estimated total intracranial volume, body mass index, diabetes mellitus, drinking status, HDL cholesterol, smoking status, sports index, systolic blood pressure, total cholesterol, triglycerides, use of antihypertensive medications, use of statins, depression, and prevalent coronary heart disease, heart failure, a…
*All analyses incorporated a weight accounting for selection into the phospholipid study group from the ARIC visit 5 sample.
**Phospholipid modeled as a 3 group ordinal variable (below LOD, >LOD-<Median, >Median).
Boldness indicates p value less than 0.00038.

## Sheet: Supplementary Table 5
Supplementary Table 5. Weighted* linear regression of individual metabolites (log-transformed per 1-SD difference) with total Alzheimer's disease signature region volume, Atherosclerosis Risk in Communities (ARIC) Study, 2011 to 2013
Metabolites	n	β (95% CI)	p-value
Asymmetric dimethylarginine (ADMA)	236	0.53 (-0.09, 1.14)	0.092004
Alanine	236	0.19 (-0.44, 0.82)	0.550069
Arginine	236	0.34 (-0.25, 0.92)	0.260571
Asparagine	236	-0.001 (-0.60, 0.60)	0.99
DL-carnitine (C0)	236	0.19 (-0.49, 0.86)	0.587456
Acetyl-L-carnitine (C2)	236	-0.44 (-1.05, 0.18)	0.163837
Propionyl-L-carnitine (C3)	235	0.17 (-0.54, 0.88)	0.643795
Hydroxybutyryl-L-carnitine [C4-OH (C3-DC)]	235	-0.32 (-0.92, 0.29)	0.308616
Butyryl-L-carnitine (C4)	235	-0.26 (-0.85, 0.33)	0.379588
Valeryl-L-carnitine (C5)	236	0.16 (-0.49, 0.82)	0.629178
Glutaryl-L-carnitine [C5-DC (C6:OH)]**	236	-0.22 (-0.96, 0.51)	0.550071
Hexanoyl-L-carnitine [C6 (C4:1-DC)]	236	-0.24 (-0.90, 0.42)	0.480802
Octanoyl-L-carnitine (C8)**	236	-0.13 (-0.92, 0.65)	0.737893
Decanoyl-L-carnitine (C10)	232	-0.22 (-0.93, 0.50)	0.552687
Decenoyl-L-carnitine (C10:1)	232	-0.28 (-0.97, 0.41)	0.430433
Dodecanoyl-L-carnitine (C12)**	232	-0.64 (-1.53, 0.25)	0.156888
Tetradecenoyl-L-carnitine (C14:1)	223	-0.02 (-0.73, 0.69)	0.956295
Tetradecadienyl-L-carnitine (C14:2)**	223	-0.21 (-1.08, 0.66)	0.637325
Hexadecanoyl-L-carnitine (C16)	223	-0.11 (-0.77, 0.55)	0.744252
Octadecanoyl-L-carnitine (C18)	232	-0.15 (-0.72, 0.42)	0.611191
Octadecenoyl-L-carnitine (C18:1)	232	-0.06 (-0.67, 0.55)	0.853235
Citrulline	236	0.40 (-0.16, 0.97)	0.159633
Creatinine	236	-0.56 (-1.25, 0.12)	0.106431
Glutamine	236	0.14 (-0.42, 0.70)	0.620145
Glycine	236	-0.07 (-0.68, 0.53)	0.809048
Hexose (H1)	127	0.44 (-0.63, 1.50)	0.421874
Histidine	236	0.38 (-0.20, 0.96)	0.196732
Isoleucine	236	0.04 (-0.63, 0.70)	0.915895
Kynurenine	236	0.14 (-0.50, 0.78)	0.664137
Leucine	236	0.04 (-0.61, 0.68)	0.915258
Lysine	236	0.58 (-0.08, 1.24)	0.0849246
lysoPC a C16:0	236	0.56 (-0.19, 1.32)	0.141864
lysoPC a C16:1	236	0.97 (0.25, 1.68)	0.00805971
lysoPC a C17:0	236	0.21 (-0.40, 0.82)	0.496249
lysoPC a C18:0	236	0.52 (-0.16, 1.20)	0.134483
lysoPC a C18:1	236	0.47 (-0.25, 1.19)	0.202802
lysoPC a C18:2	236	0.04 (-0.69, 0.78)	0.907402
lysoPC a C20:3	236	-0.07 (-0.79, 0.65)	0.840935
lysoPC a C20:4	236	-0.28 (-0.94, 0.38)	0.402968
lysoPC a C28:1	236	-0.08 (-0.72, 0.56)	0.80358
Methionine	236	0.21 (-0.41, 0.82)	0.51008
Ornithine	236	0.04 (-0.64, 0.71)	0.917304
PC aa C24:0	236	-0.03 (-0.66, 0.59)	0.917324
PC aa C28:1	236	-0.99 (-1.84, -0.13)	0.0232783
PC aa C30:0	236	0.04 (-0.73, 0.81)	0.922693
PC aa C32:0	236	-0.56 (-1.31, 0.19)	0.144273
PC aa C32:1	236	0.50 (-0.30, 1.31)	0.220195
PC aa C32:2	236	0.65 (-0.17, 1.46)	0.120219
PC aa C32:3	236	1.16 (0.46, 1.85)	0.00110614
PC aa C34:1	236	-0.01 (-0.82, 0.80)	0.977971
PC aa C34:2	236	-0.50 (-1.38, 0.38)	0.261675
PC aa C34:3	236	1.08 (0.17, 1.99)	0.0202987
PC aa C34:4	236	0.50 (-0.30, 1.31)	0.221759
PC aa C36:0	236	0.13 (-0.53, 0.80)	0.697441
PC aa C36:1	236	0.20 (-0.62, 1.02)	0.635882
PC aa C36:2	236	-0.12 (-0.99, 0.74)	0.777215
PC aa C36:3	236	-0.02 (-0.95, 0.91)	0.967083
PC aa C36:4	236	-0.88 (-1.68, -0.09)	0.0295294
PC aa C38:0	236	0.20 (-0.41, 0.82)	0.513833
PC aa C38:1	236	0.47 (-0.09, 1.03)	0.0995925
PC aa C38:3	236	0.24 (-0.60, 1.08)	0.581926
PC aa C38:4	236	-0.40 (-1.28, 0.47)	0.366872
PC aa C38:5	236	-0.05 (-0.92, 0.83)	0.914482
PC aa C38:6	236	-0.26 (-0.87, 0.35)	0.404491
PC aa C40:1**	236	0.15 (-0.63, 0.94)	0.702716
PC aa C40:2	236	-0.41 (-1.16, 0.35)	0.289832
PC aa C40:3	236	-0.24 (-1.04, 0.56)	0.557098
PC aa C40:4	236	-0.05 (-0.78, 0.68)	0.892097
PC aa C40:5	236	0.13 (-0.77, 1.02)	0.778364
PC aa C40:6	236	0.03 (-0.60, 0.67)	0.925534
PC aa C42:0	236	-0.07 (-0.67, 0.53)	0.824747
PC aa C42:1	236	-0.23 (-0.89, 0.43)	0.4935
PC aa C42:2	236	-0.66 (-1.37, 0.06)	0.072102
PC aa C42:4	236	-0.29 (-0.99, 0.41)	0.418947
PC aa C42:5	236	-0.29 (-1.00, 0.41)	0.41563
PC aa C42:6	236	-0.11 (-0.78, 0.55)	0.74134
PC ae C30:0	236	-0.15 (-0.91, 0.60)	0.693387
PC ae C30:2	236	-0.23 (-1.01, 0.54)	0.552401
PC ae C32:1	236	0.39 (-0.30, 1.08)	0.263796
PC ae C32:2	236	0.54 (-0.24, 1.31)	0.176801
PC ae C34:0	236	-0.39 (-1.10, 0.32)	0.284643
PC ae C34:1	236	0.21 (-0.55, 0.97)	0.586775
PC ae C34:2	236	0.34 (-0.39, 1.08)	0.35511
PC ae C34:3	236	0.58 (-0.11, 1.28)	0.0999332
PC ae C36:0	236	-0.22 (-0.95, 0.52)	0.565864
PC ae C36:1	236	-0.37 (-1.21, 0.47)	0.383257
PC ae C36:2	236	-0.29 (-1.07, 0.49)	0.464295
PC ae C36:3	236	0.69 (-0.03, 1.41)	0.0585417
PC ae C36:4	236	-0.04 (-0.76, 0.68)	0.917156
PC ae C36:5	236	0.12 (-0.70, 0.94)	0.778337
PC ae C38:0	236	0.15 (-0.54, 0.85)	0.661683
PC ae C38:2	236	-0.47 (-1.17, 0.23)	0.187547
PC ae C38:3	236	-0.14 (-0.91, 0.63)	0.719462
PC ae C38:4	236	-0.42 (-1.14, 0.31)	0.260375
PC ae C38:5	236	0.08 (-0.66, 0.81)	0.83921
PC ae C38:6	236	0.55 (-0.14, 1.24)	0.119482
PC ae C40:1	236	-0.64 (-1.34, 0.06)	0.0736492
PC ae C40:2	236	-0.66 (-1.23, -0.10)	0.0210092
PC ae C40:3	236	-0.08 (-0.73, 0.56)	0.804387
PC ae C40:4	236	-0.29 (-0.97, 0.39)	0.400894
PC ae C40:5	236	0.19 (-0.54, 0.91)	0.610999
PC ae C40:6	236	-0.08 (-0.67, 0.50)	0.777637
PC ae C42:1	236	-0.17 (-0.79, 0.44)	0.581656
PC ae C42:2	236	-0.17 (-0.89, 0.55)	0.641869
PC ae C42:3	236	-0.11 (-0.85, 0.62)	0.761345
PC ae C42:4	236	-0.15 (-0.76, 0.45)	0.618329
PC ae C42:5	236	0.12 (-0.53, 0.78)	0.710332
PC ae C44:3	236	-0.58 (-1.20, 0.05)	0.0715026
PC ae C44:4	236	0.14 (-0.58, 0.86)	0.708159
PC ae C44:5	236	-0.39 (-1.03, 0.26)	0.241455
PC ae C44:6	236	-0.35 (-0.95, 0.24)	0.242196
Phenylalanine	236	-0.01 (-0.78, 0.76)	0.979828
Proline	236	-0.04 (-0.64, 0.56)	0.897261
Serine	236	0.32 (-0.42, 1.07)	0.394698
SM C16:0	236	-0.73 (-1.58, 0.13)	0.0958066
SM C16:1	236	-0.05 (-0.89, 0.79)	0.909736
SM C18:0	236	-0.48 (-1.19, 0.24)	0.19236
SM C18:1	236	0.26 (-0.53, 1.05)	0.524976
SM C20:2	236	0.26 (-0.47, 0.99)	0.48827
SM C24:0	236	-0.26 (-1.16, 0.65)	0.575502
SM C24:1	236	-0.46 (-1.35, 0.43)	0.311017
SM C26:1	236	-0.38 (-1.11, 0.34)	0.298652
SM (OH) C14:1	236	-0.87 (-1.65, -0.09)	0.0284085
SM (OH) C16:1	236	-0.48 (-1.20, 0.24)	0.18955
Spermine	230	-0.42 (-1.02, 0.17)	0.162713
t4-Hydroxyproline (t4-OH-Pro)	236	-0.53 (-1.22, 0.16)	0.1319
Taurine	236	0.43 (-0.19, 1.05)	0.171405
Threonine	236	0.98 (0.21, 1.74)	0.0124787
Tryptophan	236	0.68 (0.07, 1.30)	0.0292965
Tyrosine	236	0.54 (-0.08, 1.17)	0.0866342
Valine	236	0.03 (-0.68, 0.74)	0.933057
Model: Linear regression adjusted for age, race/center, sex, APOE, education level, estimated total intracranial volume, body mass index, diabetes mellitus, drinking status, HDL cholesterol, smoking status, sports index, systolic blood pressure, total cholesterol, triglycerides, use of antihypertensive medications, use of statins, depression, and prevalent coronary heart disease, heart failure, a…
*All analyses incorporated a weight accounting for selection into the phospholipid study group from the ARIC visit 5 sample.
**Phospholipid modeled as a 3 group ordinal variable (below LOD, >LOD-<Median, >Median).
Boldness indicates p value less than 0.00038.
